# Supplementary material for: Polygenic Scores and Environmental Factors in Psychiatric Disorders: Gene–Environment Interaction Analyses Using the iPSYCH Study
Source: Research Square preprint supplement (doi:10.21203/rs.3.rs-8201911/v1), 2025-12-05
Supplement: Supplementary file 1 [file d55aeb8061a4f40a609721e4.pdf]

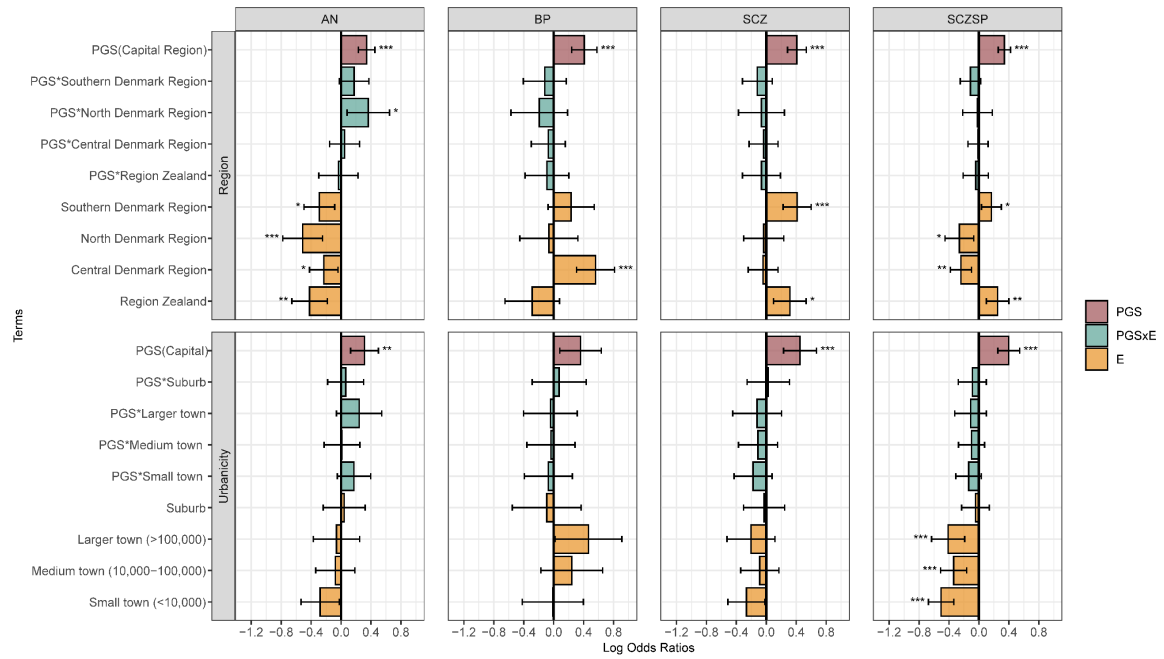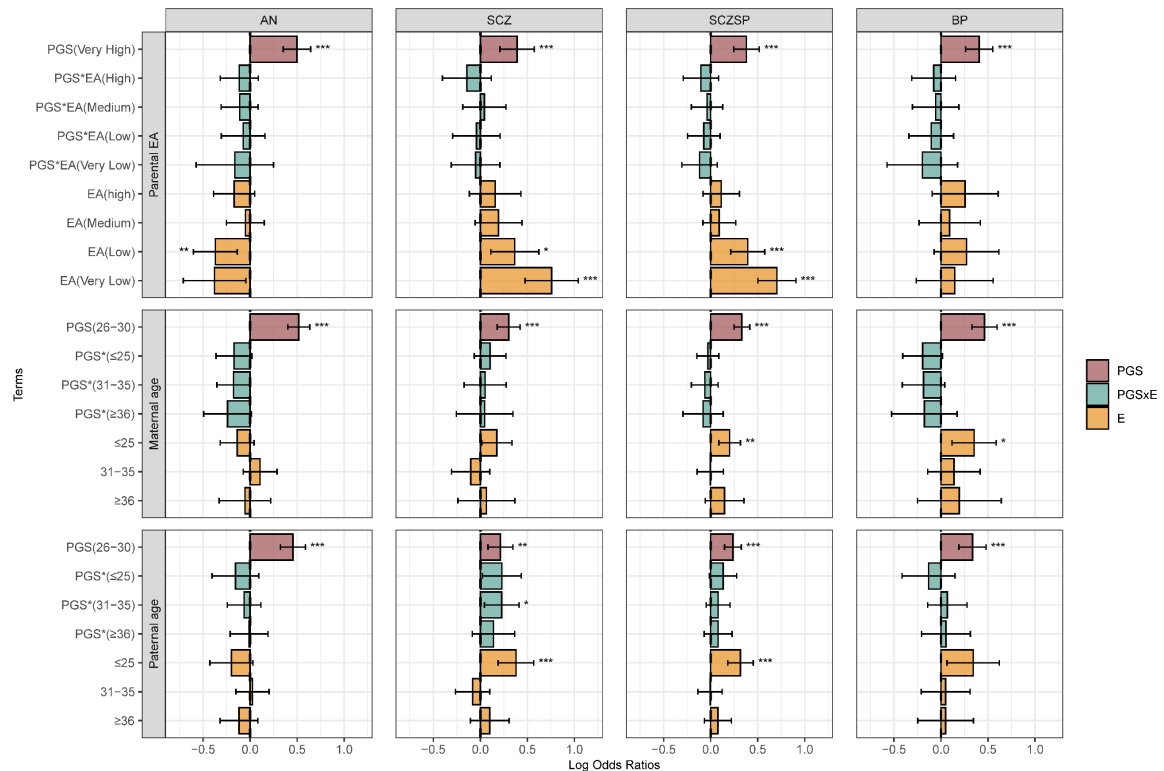

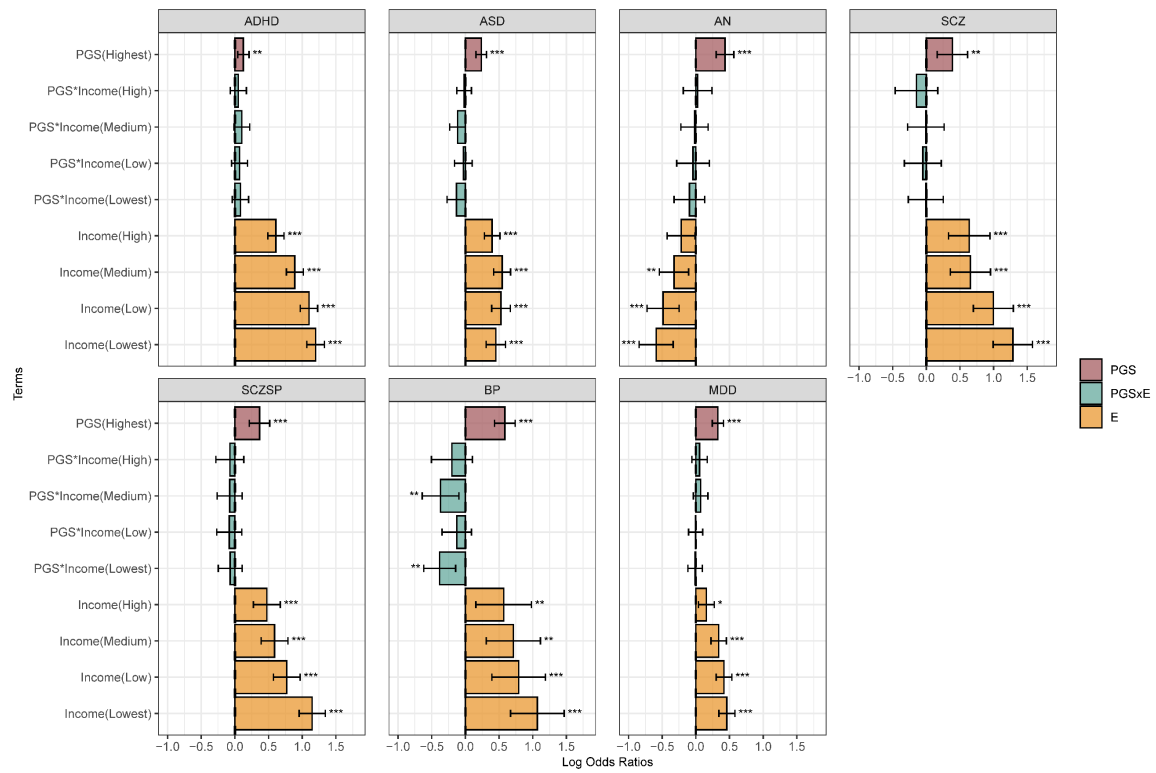

**S3 Figure. Parental income analysis.** Log odds ratios and 95% confidence intervals are shown for each model term. The top panel includes average parental income. The Very High category serves as the reference group. The PGS term represents the estimated effect of the polygenic score on the outcome within this reference category. The PGS×E (interaction) and E (environmental main effect) terms are interpreted relative to the reference category. Asterisks denote statistical significance at  $p < 0.05$  (\*),  $p < 0.01$  (\*\*), and  $p < 0.001$  (\*\*\*). AN: anorexia nervosa; SCZ: schizophrenia; SCZSP: Schizophrenia spectrum disorder; BP: Bipolar disorder.

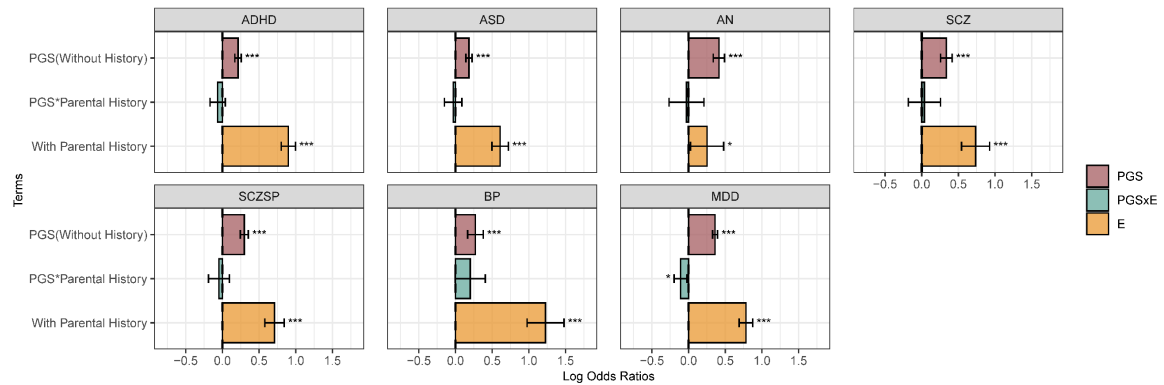

**S4 Figure. Parental history of psychiatric disorder analysis.** Log odds ratios and 95% confidence intervals are shown for each model term. No history of psychiatric disorder in any parent as the reference group. The PGS term represents the estimated effect of the polygenic score on the outcome within this reference category. The PGS×E (interaction) and E (environmental main effect) terms are interpreted relative to the reference category. Asterisks denote statistical significance at  $p < 0.05$  (\*),  $p < 0.01$  (\*\*), and  $p < 0.001$  (\*\*\*). AN: anorexia nervosa; SCZ: schizophrenia; SCZSP: Schizophrenia spectrum disorder; BP: Bipolar disorder.
