# Supplementary material for: Polygenic Scores and Environmental Factors in Psychiatric Disorders: Gene–Environment Interaction Analyses Using the iPSYCH Study
Source: Research Square preprint supplement (doi:10.21203/rs.3.rs-8201911/v1), 2025-12-05
Supplement: Supplementary file 2 [file 91b33679051ff25324ab53bc.xlsx]

## Sheet: S2
	Case	control			Autoimmune History			CNS infection History			Brain Injury Histroy			Family History of Psychiatric Disorder			Parental EA				Region				Urbanicity				Maternal Age				Paternal Age				Parental Income
Triat				Autoimmune History	Case	Control	CNS infection History	Case	Control	Brain Injury History	Case	Control	Family History of Psychiatric Disorder	Case	Control			Case	Control			Case	Control			Case	Control			case	control			case	control			Case	Control
ADHD	27543	45692	With History		319	550		289	616		498	486		5486	4191	Parental EA	Very High	2014	3307	Region	Hovedstaden	6853	14697	Urbanicity	Capital	2053	3834	Maternal Age	≤25	10611	12340	Paternal Age	≤25	5968	6486	Parental Income	Very High	2014	3307
																	High	4248	8692		Sjælland	4491	5648		Suburb	3816	6729		26-30	9690	17894		26-30	9240	15288		High	4248	8692
			Without History		27224	45142		27254	45076		27045	45206		22057	41501		Medium	9058	15173		Midtjylland	8607	10453		larger town	2542	4778		31-35	5327	11450		31-35	7162	14145		Medium	9058	15173
																	Low	7130	9445		Nordjylland	2458	4677		Medium town	8345	13014		≥36	1915	4007		≥36	4907	9545		Low	7130	9445
																	Very Low	3646	7387		Syddanmark	4996	8619		Small town	10735	16564										Very Low	3646	7387
ASD	23201	45887	With History		285	550		205	625		400	490		3900	4263		Very High	3639	7347		Hovedstaden	7550	14685		Capital	2768	3802		≤25	6078	12487		≤25	3115	6584		Very High	3639	7347
																	High	4878	9444		Sjælland	3902	5679		Suburb	3903	6735		26-30	8587	17949		26-30	7278	15340		High	4878	9444
			Without History		22916	45337		22996	45262		22801	45397		19301	41624		Medium	7607	15228		Midtjylland	5655	10555		larger town	2118	4787		31-35	6049	11444		31-35	7003	14178		Medium	7607	15228
																	Low	4509	8719		Nordjylland	2240	4688		Medium town	6586	13093		≥36	2487	4006		≥36	5590	9553		Low	4509	8719
																	Very Low	1715	3367		Syddanmark	3662	8978		Small town	7729	16697										Very Low	1715	3367
ED	7126	46344	With History		139	556		100	628		46	505		816	4350		Very High	1459	7404		Hovedstaden	2899	14833		Capital	669	3875		≤25	1808	12613		≤25	928	6640		Very High	1459	7404
																	High	1533	9561		Sjælland	734	5776		Suburb	1202	6815		26-30	2951	18129		26-30	2465	15504		High	1533	9561
			Without History		6987	45788		7026	45716		7080	45839		6310	41994		Medium	2345	15357		Midtjylland	1575	10660		larger town	851	4818		31-35	1800	11553		31-35	2247	17299		Medium	2345	15357
																	Low	1190	8827		Nordjylland	611	4272		Medium town	1960	13202		≥36	567	4048		≥36	1457	9664		Low	1190	8827
																	Very Low	406	3399		Syddanmark	1195	9048		Small town	2433	16861										Very Low	406	3399
SCZ	7320	46326	With History		113	554		150	621		7	504		1325	4337		Very High	815	7418		Hovedstaden	642	14850		Capital	755	3873		≤25	2982	12584		≤25	1640	6605		Very High	815	7418
																	High	1160	9563		Sjælland	1079	5760		Suburb	1315	6815		26-30	2490	18126		26-30	2422	15516		High	1160	9563
			Without History		7207	45772		7170	45705		7313	45822		5995	41989		Medium	2030	15369		Midtjylland	1439	10664		larger town	683	4819		31-35	1361	11570		31-35	1774	14309		Medium	2030	15369
																	Low	1852	8810		Nordjylland	642	4725		Medium town	2026	13191		≥36	487	4045		≥36	1399	9659		Low	1852	8810
																	Very Low	993	3379		Syddanmark	1703	9025		Small town	2518	16855										Very Low	993	3379
SCZS	14474	46109	With History		216	549		150	621		34	503		2614	4311		Very High	1629	7388		Hovedstaden	5197	14769		Capital	1689	3845		≤25	5642	12510		≤25	3192	6566		Very High	1629	7388
																	High	2316	9526		Sjælland	2270	5724		Suburb	2754	6765		26-30	5020	18050		26-30	4695	15443		High	2316	9526
			Without History		14258	45560		7170	45705		14440	45606		11860	41798		Medium	4112	15323		Midtjylland	2610	10625		larger town	1247	4795		31-35	2791	11522		31-35	3605	14243		Medium	4112	15323
																	Low	3582	8750		Nordjylland	1137	4709		Medium town	3972	13191		≥36	1021	4026		≥36	2819	9623		Low	3582	8750
																	Very Low	1899	3351		Syddanmark	3103	8982		Small town	4758	16795										Very Low	1899	3351
BP	3461	46464	With History		62	554		63	628		5	506		781	4344		Very High	511	7435		Hovedstaden	1055	14891		Capital	279	3888		≤25	1288	12627		≤25	717	6644		Very High	511	7435
																	High	677	9580		Sjælland	342	5790		Suburb	459	6843		26-30	1262	18187		26-30	1191	1558		High	677	9580
			Without History		3399	45910		3398	45836		3456	45985		2680	42120		Medium	1008	15415		Midtjylland	1153	10675		larger town	536	4830		31-35	694	11593		31-35	889	14340		Medium	1008	15415
																	Low	762	8835		Nordjylland	313	4739		Medium town	1004	13234		≥36	217	4056		≥36	641	9686		Low	762	8835
																	Very Low	339	3407		Syddanmark	559	92066		Small town	1165	16897										Very Low	339	3407
MDD	36811	45407	With History		713	545		736	600		121	500		6106	4187		Very High	4609	7321		Hovedstaden	11636	14583		Capital	2937	3816		≤25	13622	12223		≤25	7485	6410		Very High	4609	7321
																	High	6301	9387		Sjælland	4737	5646		Suburb	5657	6690		26-30	13335	17800		26-30	12512	15208		High	6301	9387
			Without History		36098	44862		36075	44807		36690	44907		30705	41220		Medium	11587	15094		Midtjylland	9479	10401		larger town	4026	4738		31-35	7349	11390		31-35	9718	14062		Medium	11587	15094
																	Low	8751	8572		Nordjylland	2918	4650		Medium town	10810	12886		≥36	2504	3993		≥36	6841	9497		Low	8751	8572
																	Very Low	3867	3290		Syddanmark	7616	8835		Small town	13277	16510										Very Low	3867	3290
